# Supplementary material
Source: Springer Nature journal article supplement (https://www.springermedizin.de/resource/supplementary/12875_2010_483_MOESM2_ESM.pdf/9434714)
Supplement: MOESM2 [file 9434714]

# Satisfaction & positive experience by practice list size

Phone access

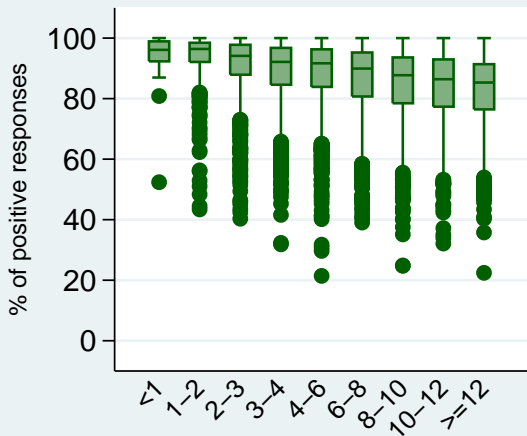

Appointment within 2 days

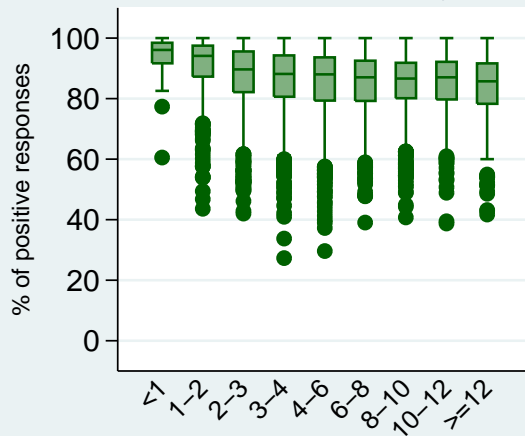

Advance appointment (>2 days)

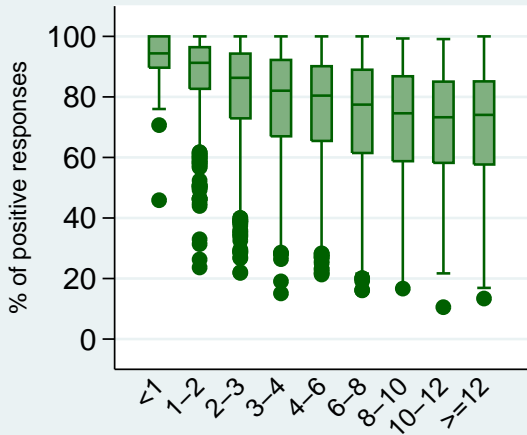

Appointment with a particular GP

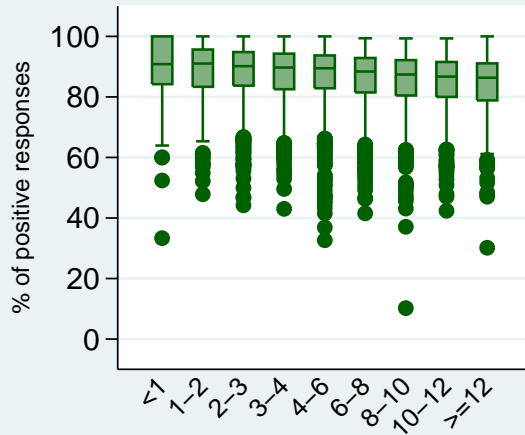

Practice size in 1,000s of patients
